# Supplementary material for: The evolutionary modifications of a GoLoco motif in the AGS protein facilitate micromere formation in the sea urchin embryo
Source: PubMed Central journal article supplement (PMC11244941; doi:10.1101/2024.06.30.601440), 2024-07-02
Supplement: NIHPP2024.06.30.601440v1-supplement-1.pdf [file NIHPP2024.06.30.601440v1-supplement-1.pdf]

Supplementary Table 1. A key resource table

| REAGENT or RESOURCE                      | SOURCE                    | IDENTIFIER    |
|------------------------------------------|---------------------------|---------------|
| <b>Antibodies</b>                        |                           |               |
| Anti-SpAGS                               | Voronina & Wessel, 2006   | N/A           |
| Anti-Gai                                 | Santa Cruz Biotech        | # sc-56536    |
| Anti- $\beta$ -catenin                   | Yazaki et al., 2015       | N/A           |
| Anti-SpInsc                              | This article              | N/A           |
| Anti-SpNuMA                              | Poon et al., 2019         | N/A           |
| Anti- $\beta$ -actin (8H10D10)           | Cell Signaling Technology | # 3700S       |
| Anti-Flag                                | Millipore-Sigma           | # F1804       |
| Alexa 488-conjugated goat anti-mouse IgG | Cell Signaling Technology | # 4412        |
| Alexa 555-conjugated goat anti-mouse IgG | Cell Signaling Technology | # 4409        |
| HRP-conjugated anti-Protein A antibody   | Abcam                     | # ab7245      |
| HRP-conjugated goat anti-mouse IgG       | Cell Signaling Technology | # 7076        |
| Anti-Digoxigenin-AP, Fab fragments       | Roche                     | # 11093274910 |
| <b>Chemicals</b>                         |                           |               |
| Hoechst 33342                            | Thermo Fisher Scientific  | # 62249       |
| DTT                                      | Millipore-Sigma           | # 10197777001 |
| Tris buffered saline, with tween (TBST)  | Millipore-Sigma           | # T9039       |
| Tris-MOPS-SDS Running Buffer             | Genscript                 | # M00138      |
| Transfer buffer powder                   | Genscript                 | # M00139      |
| DIG RNA labeling mix                     | Roche                     | #11277073910  |
| <b>Critical Commercial Assays</b>        |                           |               |
| mMESSAGE mMACHINE SP6 Transcription Kit  | Thermo Fisher Scientific  | # AM1340      |
| MEGAscript SP6 Transcription kit         | Thermo Fisher Scientific  | # AM1330      |
| MEGAscript T7 Transcription kit          | Thermo Fisher Scientific  | # AM1333      |
| In-Fusion HD Cloning                     | Clontech                  | # 639648      |

|                                                                                                                      |                          |                                                                                                                       |
|----------------------------------------------------------------------------------------------------------------------|--------------------------|-----------------------------------------------------------------------------------------------------------------------|
| Duolink <sup>®</sup> In Situ Red Starter Kit<br>Mouse/Rabbit                                                         | Millipore-Sigma          | # DUO92101                                                                                                            |
| <b>Recombinant DNA</b>                                                                                               |                          |                                                                                                                       |
| Plasmid: SpAGS-GFP                                                                                                   | Poon et al., 2019        | N/A                                                                                                                   |
| Plasmids: SpAGS-dC-term-GFP,<br>SpAGS-dGL1/2/3/4-GFP,<br>SpAGS1111/2222/2134/4234-GFP                                | This article             | N/A                                                                                                                   |
| Plasmids: SpAGS-dN-term-GFP                                                                                          | This article             | N/A                                                                                                                   |
| Plasmid: SpAGS-mCherry                                                                                               | Poon et al., 2019        | N/A                                                                                                                   |
| Plasmid: GFP-SpAGS, GFP-EtAGS,<br>GFP-PmAGS                                                                          | This article             | N/A                                                                                                                   |
| Plasmid: GFP-<br>SpAGS4444/GL1GL2/LGNGL/Dm<br>GL/EtGL/AGS3GL/PmGL/S389A/A<br>GS3GL-3S/A/AGS3GL-GL2GL3                | This article             | N/A                                                                                                                   |
| Plasmid: GFP-PmAGS-SpLinker                                                                                          | This article             | N/A                                                                                                                   |
| Plasmid: GFP-SpDlg/PmDlg                                                                                             | This article             | N/A                                                                                                                   |
| Plasmid: GFP-SpInsc/EtInsc/PmInsc                                                                                    | This article             | N/A                                                                                                                   |
| Plasmid: GFP-NuMA                                                                                                    | This article             | N/A                                                                                                                   |
| Plasmid: mCherry-NuMA                                                                                                | This article             | N/A                                                                                                                   |
| Plasmid: GFP-Par3                                                                                                    | This article             | N/A                                                                                                                   |
| Plasmid: Vasa-GFP                                                                                                    | Yajima & Wessel,<br>2011 | N/A                                                                                                                   |
| Plasmid: Vasa-mCherry                                                                                                | Uchida & Yajima,<br>2018 | N/A                                                                                                                   |
| Plasmid : 3xFlag-GFP-<br>SpAGS/SpDlg/SpNuMA, 3xFlag-<br>Vasa-GFP                                                     | This article             | N/A                                                                                                                   |
| Plasmid: 2x-mCherry-EMTB                                                                                             | Addgene                  | # 26742                                                                                                               |
| <b>Software and Algorithms</b>                                                                                       |                          |                                                                                                                       |
| Echinoderm protein sequences                                                                                         | EchinoBase               | <a href="http://www.echinobase.org/Echinobase/">http://www.echinobase.org/Echinobase/</a>                             |
| Protein motif search                                                                                                 | NCBI blast               | <a href="https://blast.ncbi.nlm.nih.gov/Blast.cgi">https://blast.ncbi.nlm.nih.gov/Blast.cgi</a>                       |
| Protein sequence alignment                                                                                           | Clustal Omega            | <a href="https://www.ebi.ac.uk/Tools/msa/clustalo/">https://www.ebi.ac.uk/Tools/msa/clustalo/</a>                     |
| Quantitative analysis                                                                                                | Image J                  | <a href="https://imagej.nih.gov/ij/">https://imagej.nih.gov/ij/</a>                                                   |
| Statistical analysis                                                                                                 | Graphpad PRISM 8         | <a href="https://www.graphpad.com/scientific-software/prism/">https://www.graphpad.com/scientific-software/prism/</a> |
| <b>Morpholino antisense oligos (Gene Tools: <a href="http://www.gene-tools.com/">http://www.gene-tools.com/</a>)</b> |                          |                                                                                                                       |
| <b>NCBI reference sequence</b>                                                                                       | <b>Name</b>              | <b>Sequence</b>                                                                                                       |
| NM_001040405.1                                                                                                       | SpAGS                    | GGCCCGTTTCACAAAGCCTTTGTTT                                                                                             |
| <b>Primers for ISH probes</b>                                                                                        |                          |                                                                                                                       |
| <b>NCBI reference sequence / Source</b>                                                                              | <b>Name</b>              | <b>Sequence</b>                                                                                                       |

|                |           |                                                                                |
|----------------|-----------|--------------------------------------------------------------------------------|
| XM_011663478.2 | SpAlx1    | F: GGATATTTTCTCGACCGGGATC<br>R: CGAGTAACCGTTCATCATCCCC                         |
| NM_214574.3    | SpBlimp1b | F: ATGGGGTGCAACGACAACGCCGTG<br>R: CTATGATTTGTTCTGTACGATTGAG                    |
| NM_214519.1    | SpEndo16  | F: GCAGAGTTCAACAGAATCGAC<br>R: GCCAGTAGACGTAGCAGAAG                            |
| XM_030976919.1 | SpEts1    | F: TCAATCATGGCGTCTATGCACTG<br>R: ACAGCTGCAGGGATAACAGG                          |
| NM_001079542.1 | SpFoxA    | F: ATGGCCAATAGTGCCATGATCTCG<br>R: TCACATTGCATGGTTTGCTTG                        |
| XM_003731512.3 | SpFoxQ2   | F: ATGACTTTATTCAGCATTGACAAC<br>R: TAGCAGGATCCTACAGAAGACCAG                     |
| NM_214610.3    | SpSm50    | F: ATGAAGGGAGTTTTGTTTATTGTGG<br>CTAGTC<br>R: GTTATGCCAACGCGTCTGCCTCTTG<br>AAGC |
| XM_786173.5    | SpTbr1    | F: CCACCGCTGCACCAGACGAC<br>R: CTGCCGGCTGGCGCCAATTGCG                           |
| NM_214667.1    | SpWnt8    | F: ATGGATGTTTTTACGGAATTTGTTG<br>R: CTACAGCCTCGATCCAACGGGCTG                    |

## Supplementary Figures and Legends

Supplemental Figure S1

A

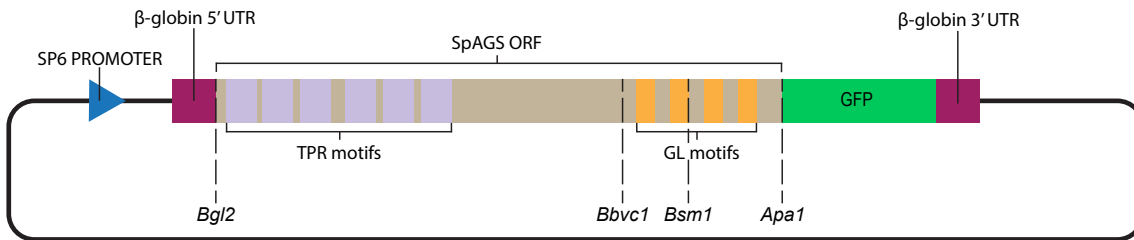

B

*S. purpuratus* AGS Protein Sequence

TPR1 TPR2  
 MQSEASCMELALEGERLCKAGNCREGVRYLEAAVEVGTDDLKLSAIYSQLGNAYFYLEDYGKALTYHKHDL  
 TPR3 117aa, before here removed in 1F  
 TLATSIGDRLGEAKASGNIGNTLKVLGKFDEAICCCQRHLDISRELSSEKVGEGRALYNLGNVYHAKGKHAGRS  
 TPR4  
 GHQDPGDFPQEVTDCLKQAIQFYEANLAIVRELGDRAAQGRACGNLGNTHYLLGNFETAIQFHTERLAIKE  
 222aa, before here removed in 2F  
 TPR5 TPR6  
 FGDKA AERRAYSNLGNACVFMVQFEVAAKYKSLHIARQLGELAMEAQACYSLGNTYLLREYKAVEYHS  
 301aa, before here removed in 3F  
 RHMEIAQQLNDRVGEGRACWSLGNHAHTSLGNHEKALHYATLHLQISREVDRTGEVTAKMNLQDLQTLFG  
 ISTADLSEVSTTVQTPLQESKGARPRRRSMENLELVAMTPEKTEIVQVPRKIRPGSKLKLKNGGESKDKQS  
 BbvC1 RE site GL1 (removed in Δ1)  
 HKDSKESVSSAKNSVPAPSKAKSQTSARKGGEPQMLDDADNFFEALSRFQSNRMDEQRCSFGRLQKKLAD  
 GL2 (removed in Δ2) Bsm1 RE site GL3 (removed in Δ3)  
 EEGNGLPEKEELLDEIAKLQGSRLNEQRAF SVKRLPGLPLRANEDVVGKLLAKGERAEPD DDFEMIIIRCQG  
 GL4 (removed in Δ4)  
 ARIEDQRSTLPIQAPAPTVPDEDFFSLIQRIQSKRIEEQRSIAPWEKSGTSCVCFYDYDTSRTEGTACCVYSRP  
 659aa  
 VQESHL

**Supplemental Figure 1. Dissection of SpAGS motifs.** **A**, The construct design of SpAGS-GFP, including the restriction enzyme sites used to prepare SpAGS mutants. **B**, The protein sequence of SpAGS. Predicted domains are labeled based on NCBI blast results, and the sequence portions deleted for each N-terminal construct are marked. The sequences for each GL motif used for deletion or swapping are indicated in orange. The internal restriction enzyme sites for *BbvCI* and *BsmI* are shown in green.

Supplemental Figure 2 Echinoderm AGS sequence alignment

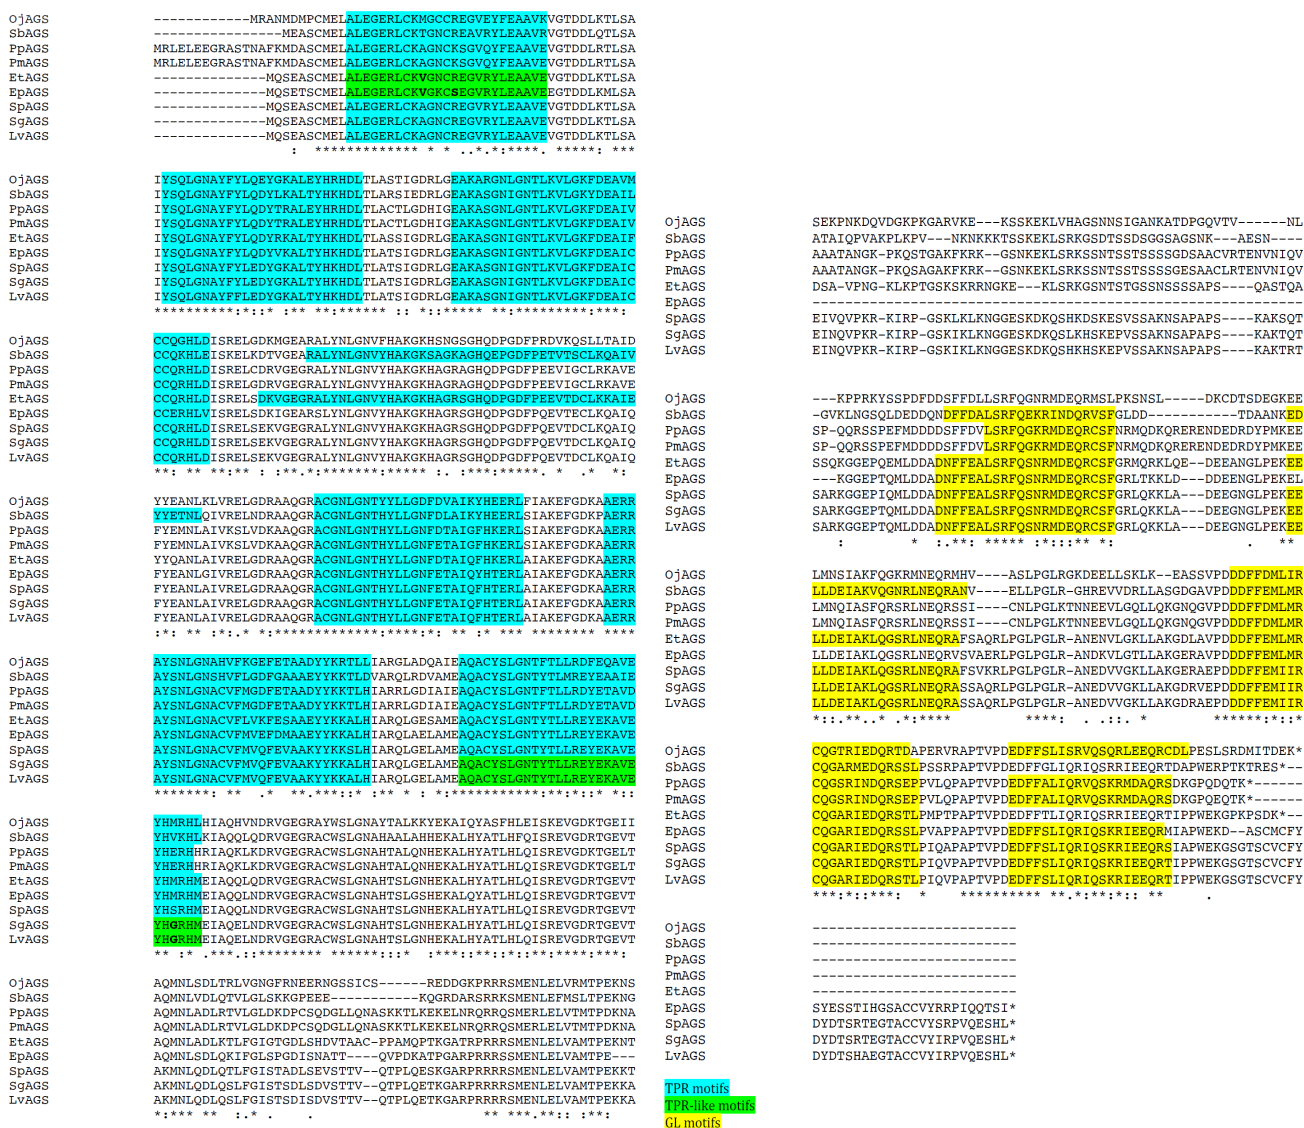

**Supplemental Figure 2. Echinoderm AGS sequence alignment.** All AGS are similar in the N-terminus with the predicted conserved TPR motifs (blue) but are highly variable in the C-terminus with the predicted GL motifs (yellow).

Supplemental Figure 3

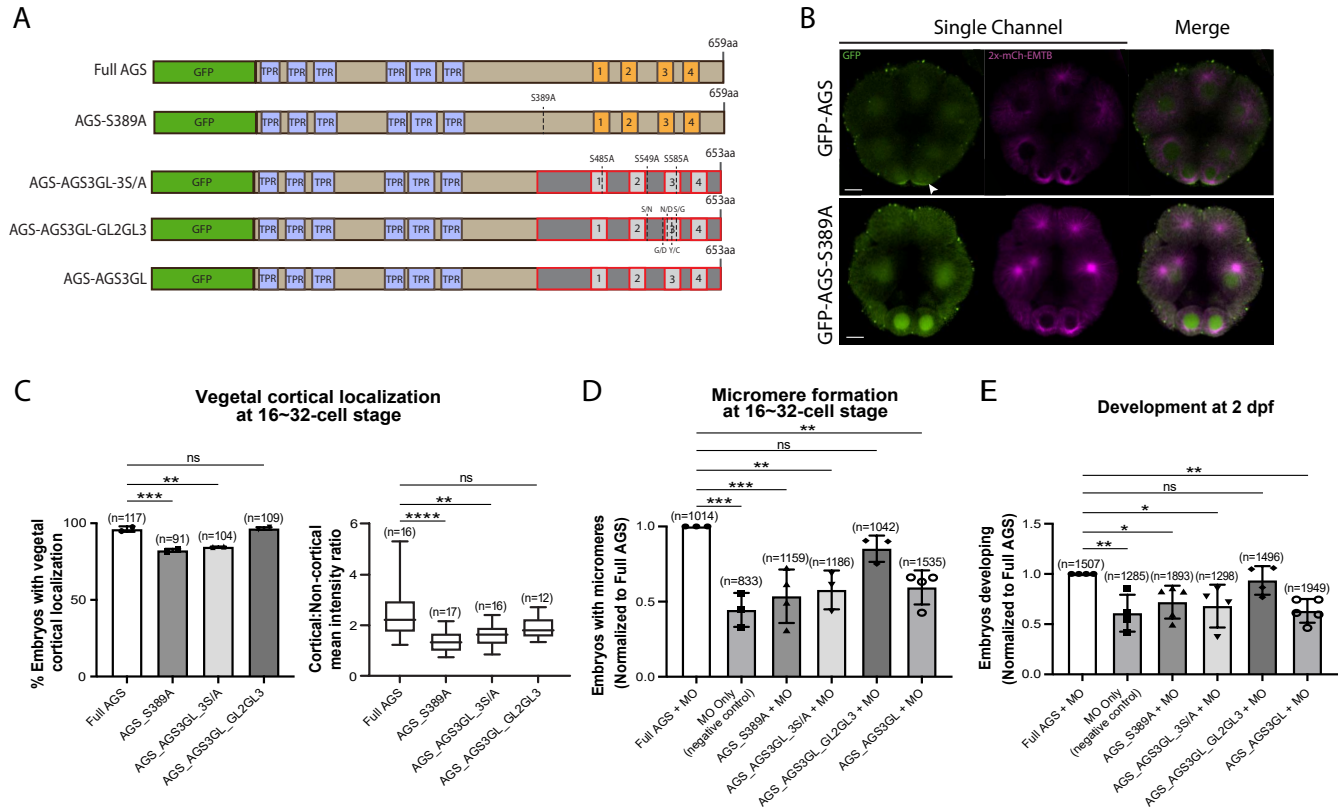

**Supplemental Figure 3. The linker domain and GL2-GL3 region are important for AGS localization and function.** **A**, Design of GFP-AGS mutant constructs tested in this study. TPR motifs are marked in blue, and GL motifs are in orange. The brown section shows the SpAGS portion and the red and grey boxes show the non-sea urchin (non-SpAGS) C-terminal sequence introduced. The dotted lines represent single amino acid mutations. **B**, Single Z-slice confocal images of sea urchin embryos at 8~16-cell stage showing localization of GFP-AGS-S389A mutant. Embryos were injected with 0.3 $\mu$ g/ $\mu$ l stock of GFP-AGS mRNA and 0.25 $\mu$ g/ $\mu$ l stock of 2x-mCherry-EMTB mRNA. The white arrowhead indicates vegetal cortical localization of GFP-AGS. **C**, % of the embryos with vegetal cortical localization of GFP-AGS mutants (left) and the ratio of the cortical-to-non-cortical mean intensity (right) in 16~32-cell embryos. Statistical analysis was performed against Full AGS by One-Way ANOVA. **D-E**, Embryos were injected with 0.15 $\mu$ g/ $\mu$ l stock of GFP-AGS mRNAs and 0.75mM SpAGS MO. The number of embryos making micromeres (D) and developing to gastrula or pluteus stage (E) were scored and normalized to that of the Full AGS. Statistical analysis was performed by One-Way ANOVA. n indicates the total number of embryos scored. \* represents p-value<0.05, \*\* p-value < 0.01, \*\*\* p-value < 0.001, and \*\*\*\* p-value <0.0001. Each experiment was performed at least two independent times. Error bars represent standard error. Scale bars=10 $\mu$ m.

Supplemental Figure 4 SpAGS, EtAGS and PmAGS linker domain sequence alignment

**A**

```

SpAGS_linker  YHSRHMETAQQLNDRVGEGRACWSLGNHAHTSLGNHEKALHYATLHLQISREVGDRTEVET 346
EtAGS_linker  YHMRHMETAQQLQDRVGEGRACWSLGNHAHTSLGNHEKALHYATLHLQISREVGDRTEVET 346
PmAGS_linker  YHERHHRITAKLKDVRVGEGRACWSLGNHAHTALQNHKALHYATLHLQISREVGDKTELT 360
** ** .**:*:*****:*****:* *****:*****:***:*

SpAGS_linker  AKMNLQDLQTLFGISTADLSEVSTT-V-QTPLQESKGARPRPRRSMENLELVAMTPEKKT 404
EtAGS_linker  AQMNLADLKTFLFGITGDLSDVTAAC-PPAMQPTKGATRPFRSMENLELVAMTPEKNT 405
PmAGS_linker  AQMNLADLRVTLGLDKDPCSQDGLLQNASKKTLEKELNQRFRSMERLELVMTPEKNA 420
*:* **:*:*. . * * *:*:***:***:***:

SpAGS_linker  EIVQVPKRKIRP-GSKLKLKNGGESKDKQSHKDSKESVSSAKNSVPAPS---KAKSQT 459
EtAGS_linker  DSA-VPNGKLPKTPGSKSKRRNGE---KLSRKGSNTSTGSSNSSSAPS---QASTQAS 457
PmAGS_linker  AAATANGPKQSGAKFKRK--GSNKEKLSRKSNTSSTSSSGESAACLRTENVNIQVS 478
. . . : * : * : . * : * : * * : . . . * . . . * : *

SpAGS_linker  ARKGGPEIQMLDDA 473
EtAGS_linker  SQKGGEPQEMLDDA 472
PmAGS_linker  P-QQRSSPEFMDDD 492
. . . : : : * *
    
```

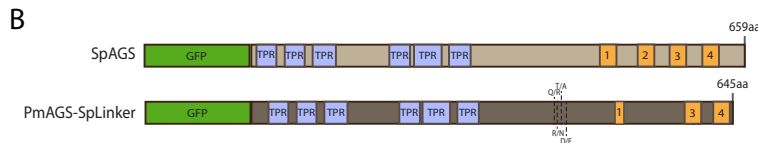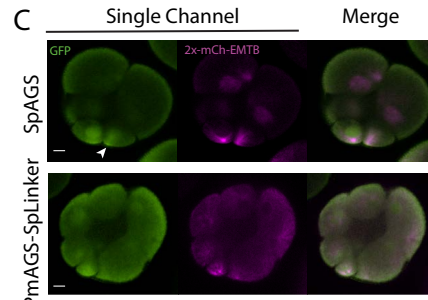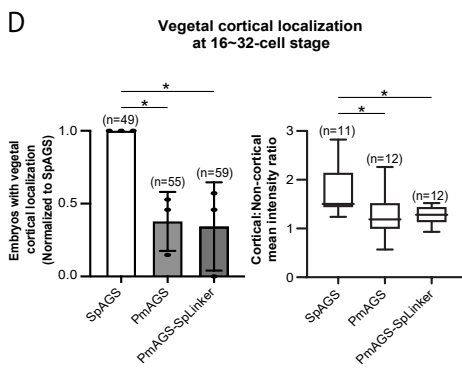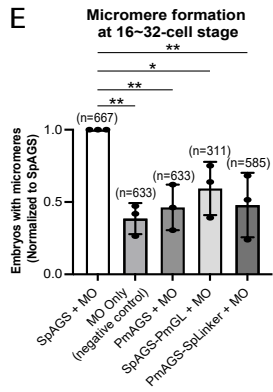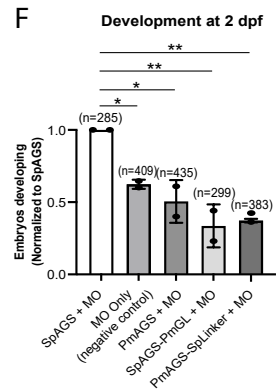

**Supplemental Figure 4. The Dlg recognition sequence in the linker domain is important for the AGS function.** **A**, Alignment of linker domain between echinoderms including sea urchin (SpAGS\_linker), pencil urchin (EtAGS\_linker), and sea star (PmAGS\_linker). Bold letters represent the conserved core of the linker domain. The green highlight indicates conserved amino acids in the consensus kinase recognition motif. The red highlight represents amino acid mutated to match SpAGS residues in the PmAGS-SpLinker mutant. **B**, Design of GFP-AGS constructs tested in this study from *S. purpuratus* (Sp) and *P. miniata* (Pm). TPR motifs are marked in blue, and GL motifs are in orange. The dotted lines represent single amino acid mutations. **C**, Single Z-slice confocal images of sea urchin embryos at 8~16-cell stage showing localization of GFP-AGS. Embryos were injected with 0.3µg/µl stock of GFP-AGS mRNAs and 0.25µg/µl stock of 2x-mCherry-EMTB mRNA. The white arrowhead indicates vegetal cortical localization of GFP-AGS. **D**, The number of embryos with vegetal cortical localization of GFP-AGS mutants in 16~32-cell embryos was scored and normalized to that of the SpAGS (left graph). Right graph shows the ratio of the cortical-to-non-cortical mean intensity. Statistical analysis was performed against SpAGS by One-Way ANOVA. **E-F**, Embryos were injected with 0.3µg/µl stock of GFP-AGS mRNAs and 0.75mM SpAGS MO. The number of embryos making micromeres (E) and developing to gastrula or pluteus stage (F) were scored and normalized to that of the SpAGS. Statistical analysis was performed by One-Way ANOVA. n indicates the total number of embryos scored. \* represents p-value<0.05, and \*\* p-value < 0.01. Each experiment was performed at least two independent times. Error bars represent standard error. Scale bars=10µm.

## Supplemental Figure S5 GoLoco Domain sequence alignment

```

SpAGS_GL 461 RKGGEPIQLDDADNFFFEALSRLFQSNRMDEQRCSFGRLQKCLA-----
DmPins_GL 455 EKLRAQATRKAADDFFEMLSRSQSKRMDDQRCSIKVNPAGAPAVATGATRKPL----
PmAGS_GL 479 PQQRSSEPFMDDDDSFVDVLSRFQGRMDEQRCSFNRMQDKQRERE-----
EtAGS_GL 459 QKGGEPQEMLDDADNFFFEALSRLFQSNRMDEQRCSFGRMQRKLQE-----
HsLGN_GL 468 NSQRKISADTI GDEGFFDLSRLFQSNRMDDQRCCLEKNCHTASTTTSSTPPKMLKT
HsAGS3_GL 460 PRTSIPRAPSSDECEFFDLLTKFQSSRMDDQRCLDDGQAGAAEATAAPTLEDRI--A
      : **: **: *..**:* ** :

SpAGS_GL DEEENGLPEKEELLDEIAKLQGSRLNEQRAFVSKRPLPGLPGLR-ANE---DVVGK---LL
DmPins_GL -----VQNSLFVDPTNLPGLKSPSSANPSAIGHGGLAR
PmAGS_GL NDEDRDYPMKEELMNQIASFQRSRLNEQRSS----ICNLPGLKTNNE---EVLGQ---LL
EtAGS_GL DEEANGLPKEKEELLDEIAKLQGSRLNEQRAFSAQRLPGLPGLR-ANE---NVLGK---LL
HsLGN_GL SSVPVVSPNTDEFFDLLASSQSRRLDDQRAS----FSNLPGLRLTQNSQ-SVLS---HL
HsAGS3_GL QPSMTASPQTEEFFDLIASSQSRRLDDQRAS----VGLPGLRITHSNA-GHLR---G-
      * : .****: . :

SpAGS_GL AKGERAEDDDDFFEMIIRCQGARIEDQRSTLP-I-----
DmPins_GL SATTTQQPDDDFLDMLMRCQGSRLEEQRSELPRPNVTMDAEAEAPPRSVPEAAVPGAPRG
PmAGS_GL QKGNQGVDDDDFFDMLMRCQGSRLINDQRSEPP-V-----
EtAGS_GL AKGDLAVDDDDFFEMLMRCQGARIEDQRSTLP-M-----
HsLGN_GL MTNDNKEADEFFDLLVKCGSRLDDDQRCAPPPA-----
HsAGS3_GL -HGEPQEPDDFFMLIKQSRLDDDQRCPPDV-----
      .:****: : *.:**:* *

SpAGS_GL -QAPAPTVPDEDFSLIQRIQSKRIEEQRSIAPWEKSGT-----SCVCFYDYDTSR
DmPins_GL QTGRGATVPDEDFSLIMKVQSGRMEDQRASIPFRNANNNNNSRS-----NNNG
PmAGS_GL -LQPAPTVPDEDFFALIQRVQSKRMDAQRSDKGPQEQTKT-----SD-----
EtAGS_GL -PTPAPTVPDEDFSLIQRIQSRRIEEQRTIPPWEKGPKP-----SDK-----
HsLGN_GL -TTKGPTVPDEDFSLILRSQGRMDEQRVLLQRDQNRDDFGLKDFLQNNALLEFKNSG
HsAGS3_GL -LPRGPTMPDEDFSLIQRVQAKRMDEQRVLDLAGGPEQAGGPPEPQQQC-----QPG
      . * :*****:** : * . **: **

SpAGS_GL TEGTACCVYSRPVQESHL
DmPins_GL SAGGAGK-----
PmAGS_GL -----
EtAGS_GL -----
HsLGN_GL KKSADH-----
HsAGS3_GL AS-----

```

### Supplemental Figure 5. Alignment of C-terminus GoLoco domain sequences used for chimeric mutants.

Sea urchin *S. purpuratus* (SpAGS\_GL), *Drosophila* (DmPins\_GL), sea star *P. miniata* (PmAGS\_GL), pencil urchin *E. tribuloides* (EtAGS\_GL), human *H. sapiens* LGN (HsLGN\_GL) and human *H. sapiens* AGS3 (HsAGS3\_GL). Bold letters indicate GoLoco motif sequences. The green highlight indicates additional serine amino acid present uniquely in HsAGS3\_GL and mutated to Alanine in AGS\_AGS3GL\_3S/A mutant. The highlighted amino acids between GL2 and GL2 and within GL3 are those mutated to match HsLGN\_GL in AGS\_AGS3GL\_GL2GL3 mutant.



## Supplemental Figure 6

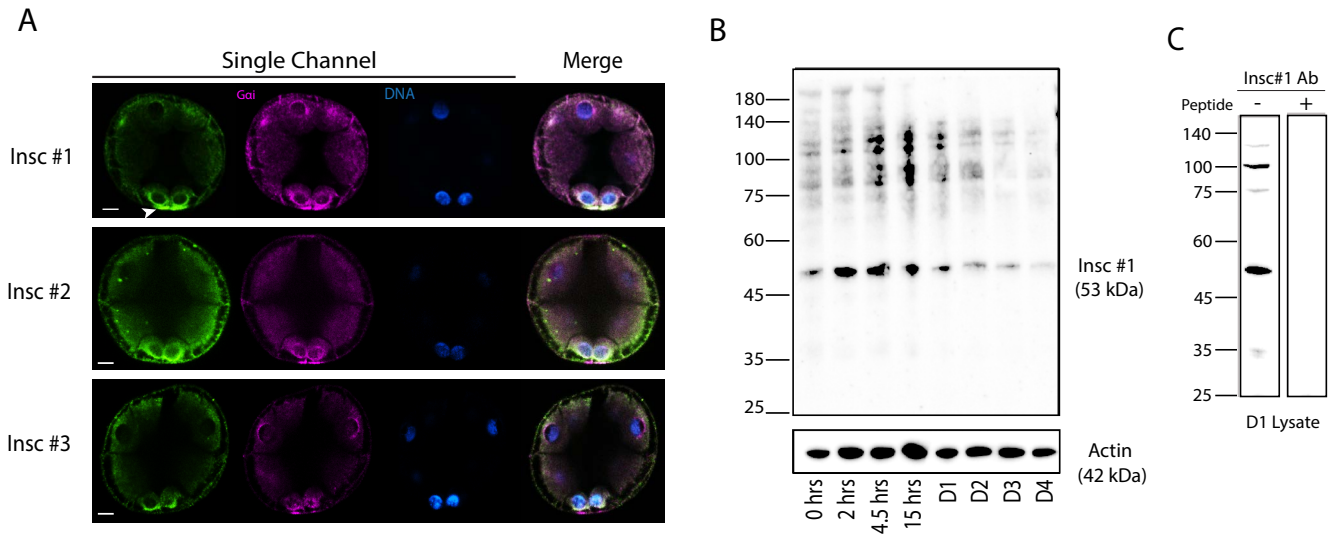

**Supplemental Figure 6. Insc protein expression during embryonic development.** **A**, Endogenous Insc protein localization by immunofluorescence. Embryos were stained with three Insc antibodies (green) designed for different Insc amino acid sequence sections. Embryos were stained with Gai antibody (magenta) and Hoechst dye (blue). During the 16-cell stage, all antibodies show signal enriched at the vegetal pole. With #2 and #3 antibodies, some non-specific cortex signals were also observed around the entire embryo. **B**, Insc immunoblot analysis. Embryos were collected at 0, 2, 4.5, 15, 24, 48, 72, and 96 hours post fertilization and subjected to immunoblot with Insc #1 antibody. Actin (42kDa) was used as a loading control. The expected size of Insc is 53kDa. **C**, Peptide competition assay with Insc #1 antibody. The 24-hour lysate was used. Each experiment was performed at least two independent times. Error bars represent standard error. Scale bars=10 $\mu$ m.

Supplemental Figure S7

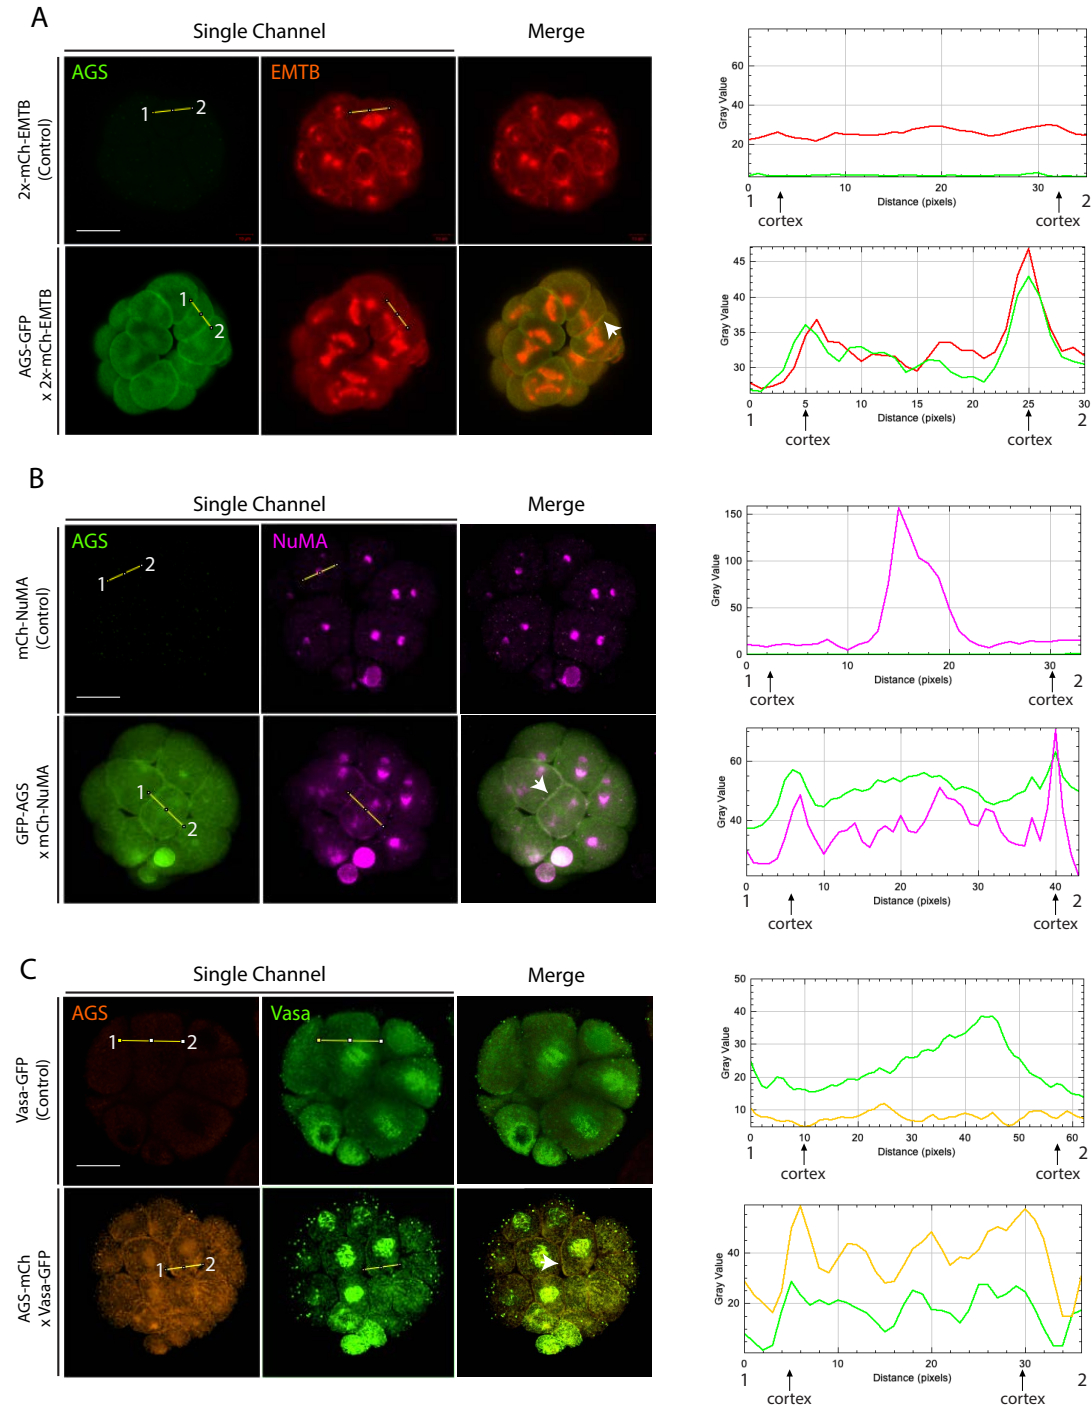

**Supplemental Figure 7. SpAGS colocalizes with micromere-specific fate determinants.** **A**, Embryos were co-injected with 2x-mCherry-EMTB (0.5 $\mu$ g/ $\mu$ l stock) mRNA with or without GFP-AGS (0.5 $\mu$ g/ $\mu$ l stock) mRNA. **B**, Embryos were co-injected with mCherry-NuMA (0.15 $\mu$ g/ $\mu$ l) mRNA with or without GFP-AGS (0.5 $\mu$ g/ $\mu$ l stock). **C**, Embryos were co-injected with Vasa-GFP (1 $\mu$ g/ $\mu$ l stock) mRNA with or without AGS-mCherry (0.5 $\mu$ g/ $\mu$ l stock) mRNA. The intensity of each signal, from one cortex to the other, was measured and plotted from point 1 to 2 on the corresponding graph (right) using *ImageJ*. White arrows indicate the cortical colocalization of each construct. All images represent over 50% of the embryos observed (n=30 or larger) per group. Scale bars=20 $\mu$ m.

Supplemental Figure 8 Sea urchin SpDlg and sea star PmDlg sequence alignment

|       |                                                                                 |     |
|-------|---------------------------------------------------------------------------------|-----|
| SpDlg | -----                                                                           | 0   |
| PmDlg | MN NIEEWEYE <b>DIILNRGGAGLGFS</b> IAGGVNDNPHV PDDPSIFITKLI PGGAAAVGGRRLRLM      | 60  |
| SpDlg | -----MVLRRWPRNPSTG <b>KTLSELIKSGKGLGFS</b>                                      | 30  |
| PmDlg | <b>DV IIRVNETEIHNVPHQNAVDALKKTKGSIVNLVV</b> RRRRQRRTGD <b>VIRIKLVKGTKGLGFS</b>  | 120 |
|       | : : * * : * * . : * : * : * * * * * * * *                                       |     |
| SpDlg | IAGGQGNQHVPGDNGIFVTKIIDGGAAEQDGR LQVGDKITAVGDN NLVEVTHE DAVAVLK                 | 90  |
| PmDlg | IAGGCGNQHVAGDNGIFVTKIIDGGAAQMDGNLIGDKIIAVGNDKLEEVTHE NAVAVLK                    | 180 |
|       | **** * * * * * * * * * * * * * * * * * * * * * * * * * * * * * * * * * * * *    |     |
| SpDlg | <b>ATSNRVL LTVIKN</b> ATLLAGTQMAPYSQNDENAQP PDVSNVDMSAANFVYAT-----              | 141 |
| PmDlg | <b>ATSEVVL LTVIKG</b> AVISYSP PASI-----TSQPDVSTMQPSSPPPPYPEAIVSSVAGV            | 234 |
|       | *** : * * * * * * * * * * : * : * : * * * * * * * * * * * * * * * * * * * *     |     |
| SpDlg | --MQPTLMQEP RSD LQELDGAFGTNVAFGTNVANGANGANGSNGEPPSYNRVTNSQPP                    | 198 |
| PmDlg | SLQSEPAL-QRPPTPPHQEMSNMNP LTYHQPPQDTAYGSM-----KMKHVPPSP                         | 284 |
|       | : * : * * * : * * : * * . : . : : : * * : : : * *                               |     |
| SpDlg | NAFNNTPAKIFIQNDGIPRE <b>PRQVVLNKGATGLGFNIVGGEDGEGIFISFILAGGVAD</b>              | 258 |
| PmDlg | TANYEGNGVKPYQNDDFPRE <b>EARTVVLNKGATGLGFNIVGGEDGEGIFISFILAGGVAD</b>             | 344 |
|       | . * : . * : * * * * * * * * * * * * * * * * * * * * * * * * * * * * * * * * * * |     |
| SpDlg | <b>LSGALRRGDQILAVNSKDLVNATHEDAA LKAGQVVTI</b> DAQYKPEEYNCFEAKIQSLR              | 318 |
| PmDlg | <b>LSGELKRGDQILSVNKKDLRGATHEDAA LKGTQTVLIEAQYKPEEYNRFEAKIQSLR</b>               | 404 |
|       | *** : * * * * * * * * * * * * * * * * * * * * * * * * * * * * * * * * * * * *   |     |
| SpDlg | EEMMQNSVS--PTGSLRTSAKRTLFVRTLFDYDKSRD SGLPSQGLSFD FGDIIHV TNASD                 | 376 |
| PmDlg | EEMNNSVSSSTT GSLRTSAKRSLYVRA LFDYDKTKDSGLPSQGLS FNYGDI LHV TNASD                | 464 |
|       | *** : * * * * * * * * * * * * * * * * * * * * * * * * * * * * * * * * * * * *   |     |
| SpDlg | <b>DEWVQARHILPENGEEGEIGIIPSKR</b> RVERKEKARLR SVKFSGNKDRNNIQEPAGTVNSKG          | 436 |
| PmDlg | <b>DEWVQAKQVLPTEEGEMGVIPSKR</b> RVEKREKARLR SVKFSGRGGS---LESKGS MNEKR           | 521 |
|       | *** : * * * * * * * * * * * * * * * * * * * * * * * * * * * * * * * * * * * *   |     |
| SpDlg | KKGFF-RKFKNRSDQETSDFEPFTSNASDSESSYRN EEVILSYEAVVQQEIKYTRPVI                     | 495 |
| PmDlg | KKGFFSRKFKKGRSDLDTS DAEHITSNASDSESSYRNDEMI LSYEGVVQQEVKYTRPVI                   | 581 |
|       | *** * * * * * * * * * * * * * * * * * * * * * * * * * * * * * * * * * * *       |     |
| SpDlg | <b>ILGPGKDRINDDLISEMPDEFGSCVPHTTRARPHEVDGRDYHFVESREQMEKDIQNHLE</b>              | 555 |
| PmDlg | <b>ILGSGKDRVNDLISEMPEKFGSCVPHTTRPRRPHEVDKRDYHFVESREQMEKDIQDHLE</b>              | 641 |
|       | *** * * * * * * * * * * * * * * * * * * * * * * * * * * * * * * * * * * *       |     |
| SpDlg | <b>IEAGQYENENLYGTSVASVKEVSEKGGKHCILDVSGNAIKRLQVAQLYPIAIFLKP KSVESI</b>          | 615 |
| PmDlg | <b>IEAGQYENENLYGTSVASVREVADKGGKHCILDVSGNAIRRLQVANLHPAIAIFIRPKSVESV</b>          | 701 |
|       | *** : * * * * * * * * * * * * * * * * * * * * * * * * * * * * * * * * * * * *   |     |
| SpDlg | <b>MEMNRVSEDAQKTYERALKLEQEFLEYFTA IILGDTIDDIYQQSKEI IHEQ</b> SGPTIWI            | 675 |
| PmDlg | <b>MEMNRMSREQAEKTYERAIKLEIEFGEFFTA IISGDTLDEIYYKKEVIHDQ</b> SGSTIWI             | 761 |
|       | : * * * * * * * * * * * * * * * * * * * * * * * * * * * * * * * * * * * *       |     |
| SpDlg | PAKEKL 681                                                                      |     |
| PmDlg | PAKDKL 767                                                                      |     |
|       | *** : * *                                                                       |     |

PDZ  
SH3  
GUK

Supplemental Figure 8. Sea urchin (SpDlg) and sea star (PmDlg) sequence alignment. Blue, yellow, and green highlights indicate the PDZ, SH3, and GUK domains, respectively.

Supplemental Figure 9 Sea urchin SpInsc, pencil urchin EtInsc and sea star PmInsc sequence alignment

|        |                                                                         |     |
|--------|-------------------------------------------------------------------------|-----|
| PmInsc | -----MNGFNES-ALAGWLADDVIEHMTDEDSVVRWLQDLRTMTCECECMCILQG                 | 49  |
| SpInsc | -----MSDN---KNTESFP-EKKLMQRCDVDSVQQWLIDIRLMPEQECTVVMET                  | 45  |
| EtInsc | MTCLYGVVRTMYGPPAPVICEEKLPSTSRFQLTEVRSVQQWLSDLQGMMECECN-ILET             | 59  |
|        | * . : . :: : ** : ** * : * * * * : :                                    |     |
| PmInsc | KPIRTSAHDMKAVTSSARDNIYILRQRASSISADFAKLYKLDSGSWDQVH-WLCLSLTI             | 108 |
| SpInsc | KPIHNSPLNLENLAATVKE SVYRLQSIKDGFLSLSQIYMCLDLSLQ-----                    | 92  |
| EtInsc | KPIHNSPLNLENVAATKENIYRLRNRAENLARELQQLYHKLTSGTYSQRLRPAVLALT              | 119 |
|        | ***:. * : : : : : : : * * : . . : : : * * .                             |     |
| PmInsc | RLRFLHECTS YVPTMPLHLFQRQQTVLEECGRLVKHAESFEELNGTLPALPTLNVLSS             | 168 |
| SpInsc | -----SVK--LFIQSLTT                                                      | 103 |
| EtInsc | HVRSCLEECNEYCPDF-LHMKEKQQVVIDAMATLVKNFEMYDNSKGCELD--SLIHSLTS            | 176 |
|        | : : * : :                                                               |     |
| PmInsc | LGKAFNDLVHMVQGI LIQT VVRSIHESASEYNIKIAINS IHCLSEDDSEIRRLLAKEGAI         | 228 |
| SpInsc | VAKAIKAYLEMVQ GALVVRKLVDMVQGAATELNVKFAVLTVHSLAQDGVWLRRLLIQEDTM          | 163 |
| EtInsc | LGNALNSIRQTVQSALVRKLVMMIQDSASELNVKFAVITAHSLSQDSIWLRRILIQENAM            | 236 |
|        | : . : * : . * * : : * : : * : : * : : * : : * : : * : : * : : * : : *   |     |
| PmInsc | QALLQLCQQASL--NAMKPMALKTVANLNCNVAEGRQLEERASGVEYLSLSSPTATESV             | 286 |
| SpInsc | RALLAICRI TTFSIRSIPTALEIVSILC TEVEGRAELEKVGVGALSEILASPTILEAV            | 223 |
| EtInsc | GALFAVCRI TTLSIPSIVTALQAI STLCAEPEGRVELEKIGGLGFLGELSSPSTSEAV            | 296 |
|        | ** : * : : : : : ** : : * * * * * : . * : * * * * * : * : *             |     |
| PmInsc | KAEAA SVIAQITSPNIDNYHLLGFIEYMEDLLKDLTALSGSASSSSVFIATSAIANIT             | 346 |
| SpInsc | KKEAASVLA EITS PDADIFHRMLCFIEHMEDLLRNLTVLC DQTS SPGVF LVATTAIANIT       | 283 |
| EtInsc | KLEAASVLA EITS PDINSYHRMLCFIEHMEDLLKNLTALCDQTSNPLVFLVSASAIANIT          | 356 |
|        | * * * * * : * : * * * : : * : * * * : * * * * * : * * : * * : * * * * * |     |
| PmInsc | FMDSMACDC LASFHTARALVKGCNNGMANTLYCKDQVATILANMAVTDQCRKEIMVSGGT           | 406 |
| SpInsc | FMDAMASDY LAEFQTA EVLIQGYLKGKAPSIYSKHQVITIIANISCSKSCREQIVSSGGM          | 343 |
| EtInsc | FMDTMSDF LAMFNATILIDGYTSGKAQNMYSKDQVVTIIANMSGSEKREQI IKAGGM             | 416 |
|        | *** : * : * * * : * * * : * : * * . * * : * : * * * : * : * : * : * : * |     |
| PmInsc | ELLVDFLHTRALVHPSSAK--KGLKGSGLSGGCSGGKQDVVMSSSCEKVHQKAAIALA              | 463 |
| SpInsc | NILAE LLQGV PSTSRPTSLSRKLSFDGN-----VSLGQMGEESAYEDIYQKAATALG             | 395 |
| EtInsc | KVLVELLHTRAPFTTVKTNQVN---QRA-----DSKAACGMASTCEHVHQKSAIALG               | 465 |
|        | : * : * : * : : : . : . : . : * : * : * : * * *                         |     |
| PmInsc | RLARDQDSAE LILELDAI PRLVELCCNRRERNDSEFVLVACLAALRKLHNLGSPVFKSS           | 523 |
| SpInsc | RLCQDYETCKMAVDLKVVSRLADLCKHARERNHRSDVLVACLAALRRIHSHIGSSPLKEN            | 455 |
| EtInsc | RLCQDHD TAMMAVDLGVIPRLVDMCRHRRERNDSEFVLVACLAALRKLH SVVGASKFEPK          | 525 |
|        | *** : * : . : : * : . * * : * : * * * . * * * * * : * : * * : .         |     |
| PmInsc | DVDQLIKPRLIDSYLMCSATK--ESFV                                             | 548 |
| SpInsc | DVEQLIQPRLMESFLHCSTTVRRETFV                                             | 482 |
| EtInsc | ALQQLIRPRLIESFVTCSSIGSTETFV                                             | 552 |
|        | : * * * : * * * : * : * : * : * * :                                     |     |

LBD (LGN-binding domain)

Supplemental Figure 9. Sea urchin (SpInsc), pencil urchin (EtInsc), and sea star (PmInsc) sequence alignment. The blue highlight indicates the LBD domain.
